# Supplementary material
Source: MDPI journal article supplement (https://www.mdpi.com/2071-1050/12/15/6126)
Supplement: s1 [file s1]

## Supplementary Materials

**Table S1.** Direct payments: measures, payment levels, expenditures and classification (type of support).

| No.                                         | Code in OECD<br>PSE Database <sup>a</sup> | Category/Measure                                                                                 | Targeted Externalities<br>(Based on Official<br>Objectives) | Year<br>Introduced | Payment per Unit of<br>Measure | Expenditures<br>in 2018<br>(CHF) | Classification<br>(Type of<br>Support) in<br>This Study <sup>b</sup> |
|---------------------------------------------|-------------------------------------------|--------------------------------------------------------------------------------------------------|-------------------------------------------------------------|--------------------|--------------------------------|----------------------------------|----------------------------------------------------------------------|
| <b>Payments for cultural landscapes</b>     |                                           |                                                                                                  |                                                             |                    |                                |                                  |                                                                      |
| 1                                           | PNSO7                                     | Contributions for open landscape                                                                 | landscape                                                   | 2014               | 100/.../390                    | 139,992,958                      | PS                                                                   |
| 2                                           | PC23                                      | Payments for farming on steep slopes (3 levels 18–35, >35–50, >50%)                              | landscape                                                   | 1986               | 410/700/1000                   | 126,601,720                      | PS                                                                   |
| 3                                           | PC35                                      | Payments for farming on very steep slopes                                                        | landscape, biodiversity                                     | 2014               | 100/.../1000                   | 11,314,875                       | PS                                                                   |
| 4                                           | PC7                                       | Payments for vineyards on steep slopes 30–50/>50/terraced                                        | landscape                                                   | 1999               | 1500/3000/5000                 | 11,456,195                       | PS                                                                   |
| 5                                           | PHR5                                      | Alpine pasturing (payment to farm sending animals)                                               | landscape, biodiversity,<br>culture                         | 2014               | 370                            | 108,498,077                      | PS                                                                   |
| 6                                           | PHR1                                      | Payments for summer pasturing (to operation receiving animals)—<br>animal and pasture categories | landscape, biodiversity,<br>culture                         | 1986               | 120/320/400/440                | 123,980,368                      | PS                                                                   |
| <b>Payments for food security</b>           |                                           |                                                                                                  |                                                             |                    |                                |                                  |                                                                      |
| 7                                           | PHR4                                      | Payments for ensuring food supplies—base payment<br>(UAA/biodiversity area)                      | food security                                               | 2014               | 900/450                        | 811,549,623                      | SO                                                                   |
| 8                                           | PC33                                      | Payments for ensuring food supplies—contribution for difficult<br>conditions (5 zones)           | food security                                               | 2014               | 240-360                        | 159,431,784                      | PS                                                                   |
| 9                                           | PC34                                      | Payments for ensuring food supplies—arable land and perennial<br>cultures                        | food security                                               | 2014               | 400                            | 113,123,296                      | SO                                                                   |
| <b>Payments for biodiversity areas (BA)</b> |                                           |                                                                                                  |                                                             |                    |                                |                                  |                                                                      |
| 10                                          | PNSO9                                     | BA—extensive grassland—level 1 (4 zones)                                                         | various emissions                                           | 1993               | 1080/860/500/450               | 67,013,623                       | SA                                                                   |
| 11                                          | PNSO10                                    | BA—extensive grassland—level 2 (4 zones)                                                         | biodiversity, landscape                                     | 2001               | 1920/1840/1700/1100            | 56,264,325                       | PS                                                                   |
| 12                                          | PNSO9                                     | BA—fen litter meadows—level 1 (4 zones)                                                          | biodiversity, landscape                                     | 1993               | 1440/1220/860/680              | 8,319,472                        | PS                                                                   |
| 13                                          | PNSO10                                    | BA—fen litter meadows—level 2 (4 zones)                                                          | biodiversity, landscape                                     | 2001               | 2060/1980/1840/1770            | 13,635,311                       | PS                                                                   |
| 14                                          | PNSO9                                     | BA—low-intensity meadow—level 1                                                                  | various emissions                                           | 1993               | 450                            | 7,175,975                        | SA                                                                   |
| 15                                          | PNSO10                                    | BA—low-intensity meadow—level 2 (2 elevation zones)                                              | biodiversity, landscape                                     | 2001               | 1200/1000                      | 3,991,018                        | PS                                                                   |
| 16                                          | PNSO9                                     | BA—extensive pasture, forest pasture—level 1                                                     | various emissions                                           | 1993               | 450                            | 21,584,987                       | SA                                                                   |
| 17                                          | PNSO10                                    | BA—extensive pasture, forest pasture—level 2                                                     | biodiversity, landscape                                     | 2001               | 700                            | 13,339,608                       | PS                                                                   |
| 18                                          | PNSO9                                     | BA—hedgerows, riparian and field woods—level 1                                                   | biodiversity, landscape                                     | 1999               | 2160                           | 8,911,221                        | PS                                                                   |
| 19                                          | PNSO10                                    | BA—hedgerows, riparian and field woods—level 2                                                   | biodiversity, landscape                                     | 2001               | 2840                           | 4,855,980                        | PS                                                                   |
| 20                                          | PNSO6                                     | BA—seeded flower fallow                                                                          | biodiversity, landscape                                     | 1994               | 3800                           | 8,550,649                        | PS                                                                   |
| 21                                          | PNSO9                                     | BA—seeded rotational fallow                                                                      | biodiversity, landscape                                     | 1999               | 3300                           | 2,160,855                        | PS                                                                   |
| 22                                          | PNSO9                                     | BA—field margin                                                                                  | biodiversity, landscape                                     | 2008               | 2300                           | 827,336                          | PS                                                                   |
| 23                                          | PNSO9                                     | BA—fallow strips on arable land                                                                  | biodiversity, landscape                                     | 1999               | 3300                           | 729,001                          | PS                                                                   |

|                                         |        |                                                                                                            |                         |      |                         |             |    |
|-----------------------------------------|--------|------------------------------------------------------------------------------------------------------------|-------------------------|------|-------------------------|-------------|----|
| 24                                      | PNSO9  | BA—vineyards with naturally occurring species diversity                                                    | biodiversity, landscape | 2014 | 1100                    | 207,779     | PS |
| 25                                      | PNSO9  | BA—riparian meadow—level 1                                                                                 | biodiversity, landscape | 1999 | 450                     | 38,219      | PS |
| 26                                      | PNSO9  | BA—flower strips for pollinators                                                                           | biodiversity, landscape | 2015 | 2500                    | 335,719     | SA |
| 27                                      | PNSO9  | BA—high-growth fruit trees—level 1                                                                         | landscape               | 1999 | 13.5                    | 28,956,907  | PS |
| 28                                      | PNSO10 | BA—high-growth fruit trees—level 2                                                                         | biodiversity, landscape | 2014 | 31.5                    | 26,410,577  | PS |
| 29                                      | PNSO9  | BA—high-growth walnut trees—level 1                                                                        | landscape               | 2014 | 13.5                    | 5,842,287   | PS |
| 30                                      | PNSO10 | BA—high-growth walnut trees—level 2                                                                        | biodiversity, landscape | 2014 | 16.5                    | 5,842,287   | PS |
| 31                                      | PNSO9  | BA—single trees and alley trees                                                                            | landscape               | 2014 | 16.5                    | 678,402     | PS |
| 32                                      | PNSO11 | BA—supplement for habitat networks—extensive pasture and forest pasture                                    | biodiversity            | 2001 | 500                     | 57,016,762  | PS |
| 33                                      | PNSO11 | BA—supplement for habitat networks—fen litter meadows                                                      | biodiversity            | 2001 | 1000                    | 6,478,636   | PS |
| 34                                      | PNSO11 | BA—supplement for habitat networks—low-intensity meadow                                                    | biodiversity            | 2001 | 1000                    | 7,725,510   | PS |
| 35                                      | PNSO11 | BA—supplement for habitat networks—extensive pasture and forest pasture                                    | biodiversity            | 2001 | 1000                    | 15,683,530  | PS |
| 36                                      | PNSO11 | BA—supplement for habitat networks—hedgerows, riparian and field woods                                     | biodiversity            | 2001 | 1000                    | 2,937,670   | PS |
| 37                                      | PNSO11 | BA—supplement for habitat networks—riparian meadow                                                         | biodiversity            | 2001 | 1000                    | 36,141      | PS |
| 38                                      | PNSO11 | BA—supplement for habitat networks—seeded flower fallow                                                    | biodiversity            | 2001 | 1000                    | 1,573,011   | PS |
| 39                                      | PNSO11 | BA—supplement for habitat networks—rotational fallow                                                       | biodiversity            | 2001 | 1000                    | 1,573,011   | PS |
| 40                                      | PNSO12 | BA—supplement for habitat networks—field margin                                                            | biodiversity            | 2001 | 1000                    | 236,672     | PS |
| 41                                      | PNSO13 | BA—supplement for habitat networks—fallow strip on arable land                                             | biodiversity            | 2001 | 1000                    | 173,870     | PS |
| 42                                      | PNSO11 | BA—supplement for habitat networks—high-growth trees (fruit and other)                                     | biodiversity            | 2001 | 5                       | 5,842,287   | PS |
| 43                                      | PNSO12 | BA—supplement for habitat networks—high-growth walnut trees                                                | biodiversity            | 2001 | 5                       | 207,779     | PS |
| 44                                      | PNSO13 | BA—supplement for habitat networks—vineyards with naturally occurring species                              | biodiversity            | 2001 | 1000                    | 1,947,692   | PS |
| 45                                      | PNSO10 | BA—summer pastures—level 2                                                                                 | biodiversity            | 2014 | 150                     | 33,524,252  | PS |
| 46                                      | PNSO9  | BA—region specific measures                                                                                | biodiversity, landscape | 2014 | variable                | 1,811,648   | PS |
| <b>Payments for landscape quality</b>   |        |                                                                                                            |                         |      |                         |             |    |
| 47                                      | PNSO8  | Contribution to landscape quality                                                                          | landscape               | 2014 | max. 360/ha, 240/LSU    | 145,917,053 | PS |
| <b>Payments for production systems</b>  |        |                                                                                                            |                         |      |                         |             |    |
| 48                                      | PC31   | Payments for organic farming—special cultures/ arable/other                                                | various emissions       | 1993 | 1600/1200/200           | 55,209,236  | SA |
| 49                                      | PC14   | Payment for extensive (only herbicides) cultivation of grains, rapeseed, sunflower and legume fodder crops | pesticide emissions     | 1992 | 400                     | 35,221,872  | SA |
| 50                                      | PC32   | Payments for extensive livestock on grassland                                                              | ammonia emissions       | 2014 | 200                     | 110,790,923 | SA |
| 51                                      | PC17   | Payments for animal housing systems—several livestock categories                                           | animal suffering        | 1996 | 90/155/280              | 83,916,838  | SA |
| 52                                      | PC18   | Payments for regularly keeping animals outdoors—several livestock categories                               | animal suffering        | 1993 | 80/165/190/290/370      | 191,616,256 | SA |
| <b>Payments for resource efficiency</b> |        |                                                                                                            |                         |      |                         |             |    |
| 53                                      | PIF4   | Payments for reduced-emissions application of manure (trailing hose, trailing shoe, injection)             | ammonia emissions       | 2014 | 30/appl. (max. 4 appl.) | 13,079,968  | SA |

|                                    |       |                                                                                      |                                        |      |                              |             |    |
|------------------------------------|-------|--------------------------------------------------------------------------------------|----------------------------------------|------|------------------------------|-------------|----|
| 54                                 | PIF4  | Payments for soil conservation sowing (mulch/strip/direct sowing)                    | nitrate emissions                      | 2014 | 150/200/250                  | 16,715,968  | SA |
| 55                                 | PIF4  | Payments for precise application of pesticides—different devices                     | pesticide emissions                    | 2014 | 25%/75% (up to limit)        | 1,395,646   | SA |
| 56                                 | PIF4  | Spraying device with separate rinsing water circuit                                  | pesticide emissions                    | 2018 | 50% of costs (max. CHF 2000) | —           | SA |
| 57                                 | PIF4  | Payments for nitrogen-reduced phase-feeding of pigs                                  | ammonia emissions                      | 2018 | 35/LSU                       | 2,425,221   | SA |
| 58                                 | PIF4  | Payments for soil conservation sowing—supplement for not using herbicides            | nitrate emissions, pesticide emissions | 2018 | 200                          | 1,779,303   | SA |
| 59                                 | PIF4  | Payment for fruit/wine production—reduced herbicides                                 | pesticide emissions                    | 2018 | 200                          | —           | SA |
| 60                                 | PIF4  | Payment for fruit/wine production—no herbicides                                      | pesticide emissions                    | 2018 | 600                          | —           | SA |
| 61                                 | PIF4  | Payment for fruit/wine production—reduced fungicides                                 | pesticide emissions                    | 2018 | 200                          | —           | SA |
| 62                                 | PIF4  | Payment for wine production—no fungicides                                            | pesticide emissions                    | 2018 | 300                          | —           | SA |
| 63                                 | PIF4  | Payment for sugar beet mechanical weeding from 4-leave stage                         | pesticide emissions                    | 2018 | 200                          | —           | SA |
| 64                                 | PIF4  | Payment for sugar beet mechanical weeding from seeding                               | pesticide emissions                    | 2018 | 400                          | —           | SA |
| 65                                 | PIF4  | Payment for sugar beet—no herbicides                                                 | pesticide emissions                    | 2018 | 800                          | —           | SA |
| 66                                 | PIF4  | Payment for sugar beet—no fungicides and insecticides                                | pesticide emissions                    | 2018 | 400                          | —           | SA |
| 67                                 | PIF4  | Payments for arable land—reduced herbicides                                          | pesticide emissions                    | 2018 | 250                          | —           | SA |
| <b>Transitional payments</b>       |       |                                                                                      |                                        |      |                              |             |    |
| 68                                 | PHNR2 | Transitional payments                                                                | none                                   | 2014 | variable                     | 113,846,761 | SO |
| <b>Supplements of single crops</b> |       |                                                                                      |                                        |      |                              |             |    |
| 69                                 | PC8   | Payments for oilseeds cultivation                                                    | food security                          | 1999 | 700                          | 21,353,981  | PS |
| 70                                 | PC36  | Area payments to sugar beet                                                          | food security                          | 2008 | 2100                         | 33,285,510  | PS |
| 71                                 | PC37  | Area payments for leguminous crops as fodder and for soya                            | food security                          | 2009 | 1000                         | 5,742,804   | SA |
| 72                                 | PIV2  | Payments for growing seed of potato and corn                                         | food security                          | 2009 | 700                          | 1,575,135   | PS |
| 73                                 | PIV2  | Payments for growing seed of grasses and leguminous crops                            | food security                          | 2009 | 1000                         | —           | PS |
| <b>Regional resource programs</b>  |       |                                                                                      |                                        |      |                              |             |    |
| 74                                 | PM3   | Payments for sustainable use of agricultural resources (Agriculture Act, Art. 77a,b) | nitrate emissions, pesticide emissions | 2009 | variable                     | 16,954,879  | SA |
| <b>Water resources protection</b>  |       |                                                                                      |                                        |      |                              |             |    |
| 75                                 | PC28  | Payments for water resources protection (Waters Protection Act, Art. 62a)            | nitrate emissions, pesticide emissions | 1999 | variable                     | 5,045,121   | SA |

Notes: “...” indicates additional payment levels in between those mentioned; “—” indicates cases where the official data sources provide only the sum of payments for two or several measures; LSU: livestock units; UAA: utilized agricultural area. <sup>a</sup>: OECD (2020), code given to the measure in the “country file” (online spreadsheet). <sup>b</sup>: Assessment based on available evaluations (see section 4.1); PS: payment for service; SA: subsidy for damage avoidance; SO: other subsidy). Data sources, see main text, Section 4.7.
